# Supplementary material
Source: MDPI journal article supplement (https://www.mdpi.com/2673-3986/2/1/10)
Supplement: s1 [file s1]

## Supplementary material: Key Findings from the European Men-Who-Have-Sex-With-Men Internet Survey in Greece

Katerina Pantavou, Georgios Tsiakalakis, Sophocles Chanos, Georgios Polkas, Georgios Papageorgiou, Nicolaos Dedes, Axel J. Schmidt and Georgios K. Nikolopoulos

**Table S1.** Education, current occupation/work status, and feelings about current income.

|                                                                                                          |                                                      | N           | %          |
|----------------------------------------------------------------------------------------------------------|------------------------------------------------------|-------------|------------|
| <b>How many years have you spent in full-time education since the age of 16?</b>                         | None                                                 | 89          | 3.1        |
|                                                                                                          | 1 to 5                                               | 772         | 26.5       |
|                                                                                                          | 6 to 10                                              | 1298        | 44.6       |
|                                                                                                          | Over 10                                              | 454         | 15.6       |
|                                                                                                          | Not answered                                         | 296         | 10.2       |
|                                                                                                          | <b>Total</b>                                         | <b>2909</b> | <b>100</b> |
| <b>Which of the following best describes your current occupation?</b>                                    | Employed full-time.                                  | 1312        | 45.1       |
|                                                                                                          | Employed part-time                                   | 241         | 8.3        |
|                                                                                                          | Self-employed                                        | 363         | 12.5       |
|                                                                                                          | Unemployed                                           | 369         | 12.7       |
|                                                                                                          | Student                                              | 454         | 15.6       |
|                                                                                                          | Retired                                              | 67          | 2.3        |
|                                                                                                          | Long-term sick leave/medically retired               | 15          | 0.5        |
|                                                                                                          | Other                                                | 70          | 2.4        |
|                                                                                                          | Not answered                                         | 18          | 0.6        |
|                                                                                                          | <b>Total</b>                                         | <b>2909</b> | <b>100</b> |
| <b>Which of these phrases would you say comes closest to your feelings about your income these days?</b> | Living really comfortably on present income          | 217         | 7.5        |
|                                                                                                          | Living comfortably on present income                 | 621         | 21.3       |
|                                                                                                          | Neither comfortable nor struggling on present income | 1268        | 43.6       |
|                                                                                                          | Struggling on present income                         | 524         | 18.0       |
|                                                                                                          | "Really struggling on present income                 | 254         | 8.7        |
|                                                                                                          | Not answered                                         | 25          | 0.9        |
|                                                                                                          | <b>Total</b>                                         | <b>2909</b> | <b>100</b> |

**Table S2.** Sexual attraction, sexual identity, and outness.

| <b>Sexual Attraction</b> <sup>1</sup> | N           | %          | <b>Sexual Identity</b> <sup>2</sup> | N           | %          | <b>Outness</b> <sup>3</sup> | N           | %          |
|---------------------------------------|-------------|------------|-------------------------------------|-------------|------------|-----------------------------|-------------|------------|
| Men                                   | 2868        | 82.2       | Gay or homosexual                   | 2099        | 72.2       | All or almost all           | 489         | 17.0       |
| Women                                 | 511         | 14.6       | Bisexual                            | 440         | 15.1       | More than half              | 643         | 22.4       |
| Non-binary <sup>4</sup>               | 99          | 2.8        | Straight or heterosexual            | 44          | 1.5        | Less than half              | 423         | 14.7       |
| I'm not attracted to anyone           | 5           | 0.1        | I don't usually use a term          | 11          | 0.4        | Few                         | 941         | 32.7       |
| Not answered                          | 8           | 0.2        | Not answered                        | 314         | 10.8       | None                        | 371         | 12.9       |
|                                       |             |            |                                     |             |            | Not answered                | 9           | 0.3        |
| <b>Total</b>                          | <b>3491</b> | <b>100</b> |                                     | <b>2909</b> | <b>100</b> |                             | <b>2876</b> | <b>100</b> |

<sup>1</sup> Who are you sexually attracted to?—Participants could select as many as apply. <sup>2</sup> Which of the following options best describes how you think of yourself? <sup>3</sup> Thinking about all the people who know you (including family, friends, and work or study colleagues), what proportion know that you are attracted to men?—Question shown when answer to question “who are you sexually attracted to?” was any of men. <sup>4</sup> People who identify as neither men nor women, or as both.

**Table S3:** Percentages of current partnerships, type of partnership, and when the last steady partnership broke up.

| Do you currently have a steady partner? | N           | %          |                                                                     |                 |
|-----------------------------------------|-------------|------------|---------------------------------------------------------------------|-----------------|
|                                         |             |            | N                                                                   | %               |
| No, I am single                         | 1750        | 60.2       | <b>When did your most recent steady relationship break-up?</b>      |                 |
|                                         |             |            | I've never had a steady relationship                                | 450 15.5        |
|                                         |             |            | Within the last 24 hours                                            | 2 0.1           |
|                                         |             |            | Within the last 7 days                                              | 11 0.4          |
|                                         |             |            | Within the last 4 weeks                                             | 53 1.8          |
|                                         |             |            | Within the last 6 months                                            | 201 6.9         |
|                                         |             |            | Within the last 12 months                                           | 229 7.8         |
|                                         |             |            | Within the last 5 years                                             | 495 17.0        |
|                                         |             |            | More than 5 years ago                                               | 228 7.8         |
|                                         |             |            | Not answered                                                        | 83 2.9          |
|                                         |             |            | <b>Total</b>                                                        | <b>1752 100</b> |
| Yes, I have a steady partner            | 867         | 29.8       | <b>Are you currently in a steady relationship with <sup>1</sup></b> |                 |
|                                         |             |            | One man only                                                        | 704 81.0        |
|                                         |             |            | More than one man (no women/non-binary)                             | 63 7.2          |
|                                         |             |            | One non-binary only                                                 | 4 0.5           |
|                                         |             |            | One woman                                                           | 18 2.1          |
|                                         |             |            | More than one woman                                                 | 10 1.2          |
|                                         |             |            | Not answered                                                        | 3 0.3           |
|                                         |             |            | <b>Total</b>                                                        | <b>869 100</b>  |
| I'm not sure or it's complicated        | 290         | 10.0       |                                                                     |                 |
| Not answered                            | 2           | 0.1        |                                                                     |                 |
| <b>Total</b>                            | <b>2909</b> | <b>100</b> |                                                                     |                 |

<sup>1</sup>Participants could select as many as apply.

**Table S4.** Buying and selling sex.

|                       | When was the last time you paid a man to have sex with you? |            | When was the last time you were paid by a man to have sex with him? |            |
|-----------------------|-------------------------------------------------------------|------------|---------------------------------------------------------------------|------------|
|                       | N                                                           | %          | N                                                                   | %          |
| Never                 | 2224                                                        | 76.5       | 2484                                                                | 85.4       |
| Within 24 hours       | 5                                                           | 0.2        | 10                                                                  | 0.3        |
| Within 7 days         | 44                                                          | 1.5        | 17                                                                  | 0.6        |
| Within 4 weeks        | 55                                                          | 1.9        | 19                                                                  | 0.7        |
| Within 6 months       | 117                                                         | 4.0        | 35                                                                  | 1.2        |
| Within 12 months      | 90                                                          | 3.1        | 29                                                                  | 1.0        |
| Within 5 years        | 146                                                         | 5.0        | 90                                                                  | 3.1        |
| More than 5 years ago | 133                                                         | 4.6        | 128                                                                 | 4.4        |
| Not answered          | 95                                                          | 3.3        | 97                                                                  | 3.3        |
| <b>Total</b>          | <b>2909</b>                                                 | <b>100</b> | <b>2909</b>                                                         | <b>100</b> |

**Table S5.** Mental health. Men were asked to report how often they had been bothered by the following problems over the last two weeks (*n* = 2909).

|                                                    | N (%)       |             |                         |                  |              |
|----------------------------------------------------|-------------|-------------|-------------------------|------------------|--------------|
|                                                    | Not at All  | Some Days   | More than Half the Days | Nearly Every Day | Not Answered |
| <b>Feeling nervous, anxious or on edge</b>         | 660 (22.7)  | 1397 (48.0) | 417 (14.3)              | 420 (14.4)       | 15 (0.5)     |
| <b>Not being able to stop or control worrying</b>  | 1361 (46.8) | 1049 (36.1) | 268 (9.2)               | 200 (6.9)        | 31 (1.1)     |
| <b>Little interest or pleasure in doing things</b> | 1084 (37.3) | 1180 (40.6) | 356 (12.2)              | 261 (9.0)        | 28 (1.0)     |
| <b>Feeling down, depressed, or hopeless</b>        | 1137 (39.1) | 1183 (40.7) | 316 (10.9)              | 246 (8.3)        | 27 (0.9)     |

|                                                                 | (39.1)         | (40.7)         | (10.9)        | (8.5)        | (0.9)        |
|-----------------------------------------------------------------|----------------|----------------|---------------|--------------|--------------|
|                                                                 | Normal         | Mild           | Moderate      | Severe       | Not Answered |
| Anxiety and depression (PHQ-4) score (PHQ-4 score) <sup>1</sup> | 1116<br>(38.4) | 1055<br>(36.3) | 420<br>(14.4) | 259<br>(8.9) | 59<br>(2.0)  |

<sup>1</sup> Patient Health Questionnaire-4 (PHQ-4) [2].

Table S6. Alcohol dependency.

|                                                                                                   | N (%)         |                |              |
|---------------------------------------------------------------------------------------------------|---------------|----------------|--------------|
|                                                                                                   | Yes           | No             | Not answered |
| Have you tried to cut down on your drinking?                                                      | 602<br>(23.3) | 1952<br>(76.7) | 26<br>(1.0)  |
| Have people annoyed you by criticising your drinking?                                             | 186<br>(7.1)  | 2357<br>(91.4) | 37<br>(1.4)  |
| Have you felt bad or guilty about your drinking?                                                  | 319<br>(12.4) | 2222<br>(86.1) | 39<br>(1.5)  |
| Have you taken a drink first thing in the morning to steady your nerves or get rid of a hangover? | 94<br>(3.6)   | 2458<br>(95.3) | 28<br>(1.1)  |
| Alcohol dependency (CAGE4) <sup>1</sup>                                                           | 289<br>(9.9)  | 2560<br>(88.0) | 60<br>(2.1)  |

<sup>1</sup> CAGE4 questions for alcohol use [1].

Table S7. Sex with non-steady male partners and condom use in the last 12 months.

|                                                                                                         | N     | %    | N                                                                                   | %    |      |
|---------------------------------------------------------------------------------------------------------|-------|------|-------------------------------------------------------------------------------------|------|------|
| Have you ever had any kind of sex with a man (please include any sexual contact, not just intercourse)? |       |      | Have you ever had intercourse with a man either with or without a condom?           |      |      |
| No                                                                                                      | 85    | 2,9  | 212                                                                                 | 7.3  |      |
| Yes                                                                                                     | 2.821 | 97,0 | 2.603                                                                               | 89.5 |      |
| Not answered                                                                                            | 3     | 0,1  | 9                                                                                   | 0.3  |      |
| Total                                                                                                   | 2909  | 100  | 2909                                                                                | 100  |      |
| Have you had any kind of sex with a non-steady male partner?                                            |       |      | How often were condoms used when you had intercourse with non-steady male partners? |      |      |
| No                                                                                                      | 742   | 25.5 | Never                                                                               | 79   | 4.2  |
| Yes                                                                                                     | 2153  | 74.0 | Seldom                                                                              | 74   | 3.9  |
| Not answered                                                                                            | 14    | 0.5  | Sometimes                                                                           | 132  | 7.0  |
|                                                                                                         |       |      | Mostly                                                                              | 540  | 28.6 |
|                                                                                                         |       |      | Always                                                                              | 1058 | 56.0 |
|                                                                                                         |       |      | Not answered                                                                        | 6    | 0.3  |
| Total                                                                                                   | 2909  | 100  | Total                                                                               | 1889 | 100  |
| Number of non-steady male                                                                               |       |      |                                                                                     |      |      |
| Intercourse partners                                                                                    |       |      | Condomless intercourse partners                                                     |      |      |
| None                                                                                                    | 245   | 11.4 | 946                                                                                 | 50.1 |      |
| 1                                                                                                       | 294   | 13.7 | 322                                                                                 | 17.1 |      |
| 2                                                                                                       | 274   | 12.7 | 182                                                                                 | 9.6  |      |
| 3                                                                                                       | 180   | 8.4  | 82                                                                                  | 4.3  |      |
| 4                                                                                                       | 137   | 6.4  | 64                                                                                  | 3.4  |      |
| 5                                                                                                       | 163   | 7.6  | 30                                                                                  | 1.6  |      |
| 6                                                                                                       | 70    | 3.3  | 21                                                                                  | 1.1  |      |
| 7                                                                                                       | 44    | 2.0  | 18                                                                                  | 1.0  |      |
| 8                                                                                                       | 55    | 2.6  | 5                                                                                   | 0.3  |      |
| 9                                                                                                       | 18    | 0.8  | 6                                                                                   | 0.3  |      |
| 10                                                                                                      | 133   | 6.2  | 33                                                                                  | 1.8  |      |
| 11–20                                                                                                   | 254   | 11.8 | 48                                                                                  | 2.5  |      |
| 21–30                                                                                                   | 108   | 5.0  | 26                                                                                  | 1.4  |      |
| 31–40                                                                                                   | 49    | 2.3  | 9                                                                                   | 0.5  |      |
| 41–50                                                                                                   | 32    | 1.5  | 10                                                                                  | 0.5  |      |

|              |      |     |      |     |
|--------------|------|-----|------|-----|
| >50          | 78   | 3.6 | 19   | 1.0 |
| Not answered | 19   | 0.9 | 68   | 3.6 |
| Total        | 2153 | 100 | 1889 | 100 |

**Table S8.** Sex under intoxication.

|                                                                                                                                  |                   | N    | %    |
|----------------------------------------------------------------------------------------------------------------------------------|-------------------|------|------|
| <b>In the last 12 months, how much of the sex you've had with men has been under the influence of alcohol or any other drug?</b> | None of it        | 1573 | 58.6 |
|                                                                                                                                  | Almost none of it | 582  | 21.7 |
|                                                                                                                                  | Less than half    | 256  | 9.5  |
|                                                                                                                                  | About half        | 82   | 3.1  |
|                                                                                                                                  | More than half    | 76   | 2.8  |
|                                                                                                                                  | Almost all of it  | 73   | 2.7  |
|                                                                                                                                  | All of it         | 29   | 1.1  |
|                                                                                                                                  | Not answered      | 13   | 0.5  |
| Total                                                                                                                            | 2688              | 100  |      |

**Table S9.** Self-efficacy measures considering sex ( $n = 2909$ ).

|                                                             | N (%)             |              |               |                |                |              |
|-------------------------------------------------------------|-------------------|--------------|---------------|----------------|----------------|--------------|
|                                                             | Strongly Disagree | Disagree     | Not Sure      | Agree          | Strongly Agree | Not Answered |
| <b>The sex I have is always as safe as I want it to be.</b> | 60<br>(2.1)       | 184<br>(6.3) | 417<br>(14.3) | 1302<br>(44.8) | 938<br>(32.2)  | 8<br>(0.3)   |
| <b>I find it easy to say 'no' to sex I don't want.</b>      | 31<br>(1.1)       | 113<br>(3.9) | 328<br>(11.3) | 1084<br>(37.3) | 1337<br>(46.0) | 16<br>(0.5)  |

**Table S10.** HIV transmission, testing, and treatment knowledge ( $n = 2909$ ). All the following statements are true.

| <u>General knowledge</u>                                                                                                          | N (%)               |                          |                            |                         |                       |              |
|-----------------------------------------------------------------------------------------------------------------------------------|---------------------|--------------------------|----------------------------|-------------------------|-----------------------|--------------|
|                                                                                                                                   | I knew this already | I wasn't sure about this | I didn't know this already | I don't understand this | I do not believe this | Not answered |
| AIDS is caused by a virus called HIV.                                                                                             | 2835<br>(97.5)      | 47<br>(1.6)              | 19<br>(0.7)                | 2<br>(0.1)              | 4<br>(0.1)            | 2<br>(0.1)   |
| You cannot be confident about whether someone has HIV or not from their appearance.                                               | 2706<br>(93.0)      | 116<br>(4.0)             | 35<br>(1.2)                | 23<br>(0.8)             | 25<br>(0.9)           | 4<br>(0.1)   |
| <u>Transmission</u>                                                                                                               |                     |                          |                            |                         |                       |              |
| HIV cannot be passed during kissing, including deep kissing, because saliva does not transmit HIV.                                | 2581<br>(88.7)      | 229<br>(7.9)             | 53<br>(1.8)                | 1<br>(0.0)              | 27<br>(0.9)           | 18<br>(0.6)  |
| You can pick up HIV through your penis while being 'active' in anal or vaginal sex without a condom, even if you don't ejaculate. | 2479<br>(85.2)      | 293<br>(10.1)            | 107<br>(3.7)               | 0<br>(0.0)              | 9<br>(0.3)            | 21<br>(0.7)  |
| You can pick up HIV through your rectum or vagina while being 'passive' during sex.                                               | 2788<br>(95.8)      | 55<br>(1.9)              | 36<br>(1.2)                | 2<br>(0.1)              | 2<br>(0.1)            | 26<br>(0.9)  |
| <u>Test</u>                                                                                                                       |                     |                          |                            |                         |                       |              |
| There is a medical test that can show whether or not you have HIV.                                                                | 2858<br>(92.3)      | 26<br>(0.9)              | 13<br>(0.5)                | 3<br>(0.1)              | 3<br>(0.1)            | 6<br>(0.2)   |
| If someone becomes infected with HIV it may take several weeks before it can be detected in a test.                               | 2629<br>(90.4)      | 171<br>(5.9)             | 93<br>(3.2)                | 4<br>(0.1)              | 8<br>(0.3)            | 4<br>(0.1)   |
| <u>Treatment</u>                                                                                                                  |                     |                          |                            |                         |                       |              |
| There is currently no cure for HIV infection.                                                                                     | 2379<br>(81.8)      | 294<br>(10.1)            | 97<br>(3.3)                | 16<br>(0.6)             | 107<br>(3.7)          | 16<br>(0.6)  |
| HIV infection can be controlled with medicines so that its impact on health is much less.                                         | 2689<br>(92.4)      | 135<br>(4.6)             | 53<br>(1.8)                | 2<br>(0.1)              | 6<br>(0.2)            | 24<br>(0.8)  |

|                                                                                                                                                 |                |               |               |             |              |             |
|-------------------------------------------------------------------------------------------------------------------------------------------------|----------------|---------------|---------------|-------------|--------------|-------------|
| <b>A person with HIV who is on effective treatment (called ‘undetectable viral load’) cannot pass his/her virus to someone else during sex.</b> | 1466<br>(50.4) | 709<br>(24.4) | 495<br>(17.0) | 36<br>(1.2) | 187<br>(6.4) | 16<br>(0.6) |
|-------------------------------------------------------------------------------------------------------------------------------------------------|----------------|---------------|---------------|-------------|--------------|-------------|

**Table S11.** Post-exposure prophylaxis (PEP) and pre-exposure prophylaxis (PrEP) knowledge ( $n = 2909$ ). All the following statements are true.

|                                                                                                                                                                                               | N (%)               |                          |                            |                         |                       |              |
|-----------------------------------------------------------------------------------------------------------------------------------------------------------------------------------------------|---------------------|--------------------------|----------------------------|-------------------------|-----------------------|--------------|
|                                                                                                                                                                                               | I knew this already | I wasn't sure about this | I didn't know this already | I don't understand this | I do not believe this | Not answered |
| <b>Post-exposure prophylaxis (PEP) attempts to stop HIV infection taking place after a person is exposed to the virus (for example by having intercourse without a condom).</b>               | 1640<br>(56.4)      | 387<br>(13.3)            | 814<br>(28.0)              | 34<br>(1.2)             | 24<br>(0.8)           | 10<br>(0.3)  |
| <b>PEP is a one-month course of anti-HIV drugs.</b>                                                                                                                                           | 1158<br>(39.8)      | 505<br>(17.4)            | 1215<br>(41.8)             | 12<br>(0.4)             | 11<br>(0.4)           | 8<br>(0.3)   |
| <b>PEP should be started as soon as possible after exposure, preferably within hours.</b>                                                                                                     | 1556<br>(53.5)      | 309<br>(10.6)            | 1006<br>(34.6)             | 5<br>(0.2)              | 8<br>(0.3)            | 25<br>(0.9)  |
| <b>Pre-exposure prophylaxis (PrEP) involves someone who does not have HIV taking pills before as well as after sex to prevent him/her from getting HIV.</b>                                   | 1267<br>(43.6)      | 365<br>(12.6)            | 1209<br>(41.6)             | 36<br>(1.2)             | 19<br>(0.7)           | 13<br>(0.5)  |
| <b>PrEP can be taken as a single daily pill if someone does not know in advance when they will have sex.</b>                                                                                  | 963<br>(33.1)       | 416<br>(14.3)            | 1454<br>(50.0)             | 28<br>(1.0)             | 30<br>(1.0)           | 18<br>(0.6)  |
| <b>If someone knows in advance when they will have sex, PrEP needs to be taken as a double dose approximately 24 hours before sex and then at both 24 and 48 hours after the double dose.</b> | 379<br>(13.0)       | 376<br>(12.9)            | 2.043<br>(70.2)            | 47<br>(1.6)             | 32<br>(1.1)           | 32<br>(1.1)  |

**Table S12.** Hepatitis knowledge and knowledge of where to get hepatitis A and B vaccinations among men who could benefit from hepatitis A and B vaccine (i.e., men who had not been vaccinated against hepatitis A/B or who had not completed the course of vaccinations, or who did not know their hepatitis A/B vaccination status).

|                                                                                                                      | N (%)               |                          |                            |                         |                       |              |
|----------------------------------------------------------------------------------------------------------------------|---------------------|--------------------------|----------------------------|-------------------------|-----------------------|--------------|
|                                                                                                                      | I knew this already | I wasn't sure about this | I didn't know this already | I don't understand this | I do not believe this | Not answered |
| <b>Hepatitis is an inflammation of the liver.</b>                                                                    | 2224<br>(76.5)      | 401<br>(13.8)            | 266<br>(9.1)               | 3<br>(0.1)              | 4<br>(0.1)            | 11<br>(0.4)  |
| <b>Most cases of hepatitis are caused by viruses.</b>                                                                | 2073<br>(71.3)      | 550<br>(18.9)            | 259<br>(8.9)               | 3<br>(0.1)              | 6<br>(0.2)            | 18<br>(0.6)  |
| <b>There are several types of hepatitis viruses, named after the letters of the alphabet.</b>                        | 2589<br>(89.0)      | 128<br>(4.4)             | 165<br>(5.7)               | 2<br>(0.1)              | 1<br>(0.0)            | 24<br>(0.8)  |
| <b>Vaccines exist for both hepatitis A and hepatitis B.</b>                                                          | 2457<br>(84.5)      | 329<br>(11.3)            | 101<br>(3.5)               | 2<br>(0.1)              | 2<br>(0.1)            | 18<br>(0.6)  |
| <b>Doctors recommend men-who-have-sex with- men are vaccinated against both hepatitis A and hepatitis B viruses.</b> | 1501<br>(51.6)      | 603<br>(20.7)            | 774<br>(26.6)              | 7<br>(0.2)              | 10<br>(0.3)           | 14<br>(0.5)  |
| <b>Do you know where you could get vaccinated against</b>                                                            | <b>Hepatitis A</b>  |                          |                            | <b>Hepatitis B</b>      |                       |              |
|                                                                                                                      | No                  | 671                      | 40.6                       | 620                     | 40.8                  |              |
|                                                                                                                      | Yes                 | 600                      | 36.3                       | 551                     | 36.2                  |              |
|                                                                                                                      | Not sure            | 360                      | 21.8                       | 345                     | 22.7                  |              |
|                                                                                                                      | Not answered        | 20                       | 1.2                        | 5                       | 0.3                   |              |
| Total                                                                                                                | 1651                | 100                      | 1521                       | 100                     |                       |              |

**Table S13.** Homophobic abuse: intimidation, insults, and violence (*n* = 2909).

| When was the last time you                                                                             | N                         | %    |      |
|--------------------------------------------------------------------------------------------------------|---------------------------|------|------|
| <b>were stared at or intimidated because someone knew or presumed you are attracted to men?</b>        | Never                     | 1316 | 45.2 |
|                                                                                                        | Within the last 24 hours  | 58   | 2.0  |
|                                                                                                        | Within the last 7 days    | 136  | 4.7  |
|                                                                                                        | Within the last 4 weeks   | 129  | 4.4  |
|                                                                                                        | Within the last 6 months  | 204  | 7.0  |
|                                                                                                        | Within the last 12 months | 162  | 5.6  |
|                                                                                                        | Within the last 5 years   | 322  | 11.1 |
|                                                                                                        | More than 5 years ago     | 573  | 19.7 |
|                                                                                                        | Not answered              | 9    | 0.3  |
| <b>had verbal insults directed at you, because someone knew or presumed you are attracted to men?</b>  | Never                     | 1298 | 44.6 |
|                                                                                                        | Within the last 24 hours  | 25   | 0.9  |
|                                                                                                        | Within the last 7 days    | 45   | 1.6  |
|                                                                                                        | Within the last 4 weeks   | 79   | 2.7  |
|                                                                                                        | Within the last 6 months  | 155  | 5.3  |
|                                                                                                        | Within the last 12 months | 129  | 4.4  |
|                                                                                                        | Within the last 5 years   | 407  | 14.0 |
|                                                                                                        | More than 5 years ago     | 757  | 26.0 |
|                                                                                                        | Not answered              | 14   | 0.5  |
| <b>were punched, hit, kicked, or beaten because someone knew or presumed you are attracted to men?</b> | Never                     | 2553 | 87.8 |
|                                                                                                        | Within the last 24 hours  | 5    | 0.2  |
|                                                                                                        | Within the last 7 days    | 3    | 0.1  |
|                                                                                                        | Within the last 4 weeks   | 9    | 0.3  |
|                                                                                                        | Within the last 6 months  | 10   | 0.3  |
|                                                                                                        | Within the last 12 months | 19   | 0.7  |
|                                                                                                        | Within the last 5 years   | 53   | 1.8  |
|                                                                                                        | More than 5 years ago     | 247  | 8.5  |
|                                                                                                        | Not answered              | 10   | 0.3  |

**Table S14.** Sources of condoms in the last 12 months and most common source.

|                                                         | N    | %    |
|---------------------------------------------------------|------|------|
| <b>Where have you got condoms from...? <sup>1</sup></b> |      |      |
| From an online pharmacy                                 | 119  | 2.9  |
| Bought at a physical shop (not online)                  | 2072 | 49.9 |
| Bought from a vending machine                           | 76   | 1.8  |
| Free from clinics                                       | 265  | 6.4  |
| Free from gay bars or clubs                             | 232  | 5.6  |
| Free from saunas                                        | 206  | 5.0  |
| Free from gay or HIV community organisations            | 419  | 10.1 |
| From friends or sex partners                            | 376  | 9.0  |
| Other answers                                           | 80   | 1.9  |
| I have not got condoms in the last 12 months            | 299  | 7.2  |
| Not answered                                            | 11   | 0.3  |
| Total                                                   | 4155 | 100  |

<sup>1</sup> Participants could select as many as apply.



**Table S15.** Recency of seeing/hearing any information about HIV or STIs specifically for men who have sex with men.

|                           | N    | %    |
|---------------------------|------|------|
| Never                     | 64   | 2.2  |
| Within the last 24 hours  | 324  | 11.1 |
| Within the last 7 days    | 564  | 19.4 |
| Within the last 4 weeks   | 484  | 16.6 |
| Within the last 6 months  | 514  | 17.7 |
| Within the last 12 months | 234  | 8.0  |
| Within the last 5 years   | 118  | 4.1  |
| More than 5 years ago     | 71   | 2.4  |
| Not answered              | 536  | 18.4 |
| Total                     | 2909 | 100  |

**Table S16.** Satisfaction with support and information received during HIV testing.

| When you were diagnosed HIV positive/tested for HIV, how satisfied were you with the support and information you received? | HIV positive |      | HIV negative <sup>1</sup> |      |
|----------------------------------------------------------------------------------------------------------------------------|--------------|------|---------------------------|------|
|                                                                                                                            | N            | %    | N                         | %    |
| Did not receive any support or information                                                                                 | 43           | 13.5 | 620                       | 33.0 |
| Very satisfied                                                                                                             | 88           | 27.6 | 677                       | 36.1 |
| Satisfied                                                                                                                  | 109          | 34.2 | 396                       | 21.1 |
| Dissatisfied                                                                                                               | 41           | 12.9 | 37                        | 2.0  |
| Very dissatisfied                                                                                                          | 25           | 7.8  | 17                        | 0.9  |
| I don't remember/I did not think about it                                                                                  | 13           | 4.1  | 100                       | 55.3 |
| Not answered                                                                                                               |              |      | 31                        | 1.7  |
| Total                                                                                                                      | 319          | 100  | 1878                      | 100  |

<sup>1</sup> Participants tested for HIV and diagnosed HIV-negative.

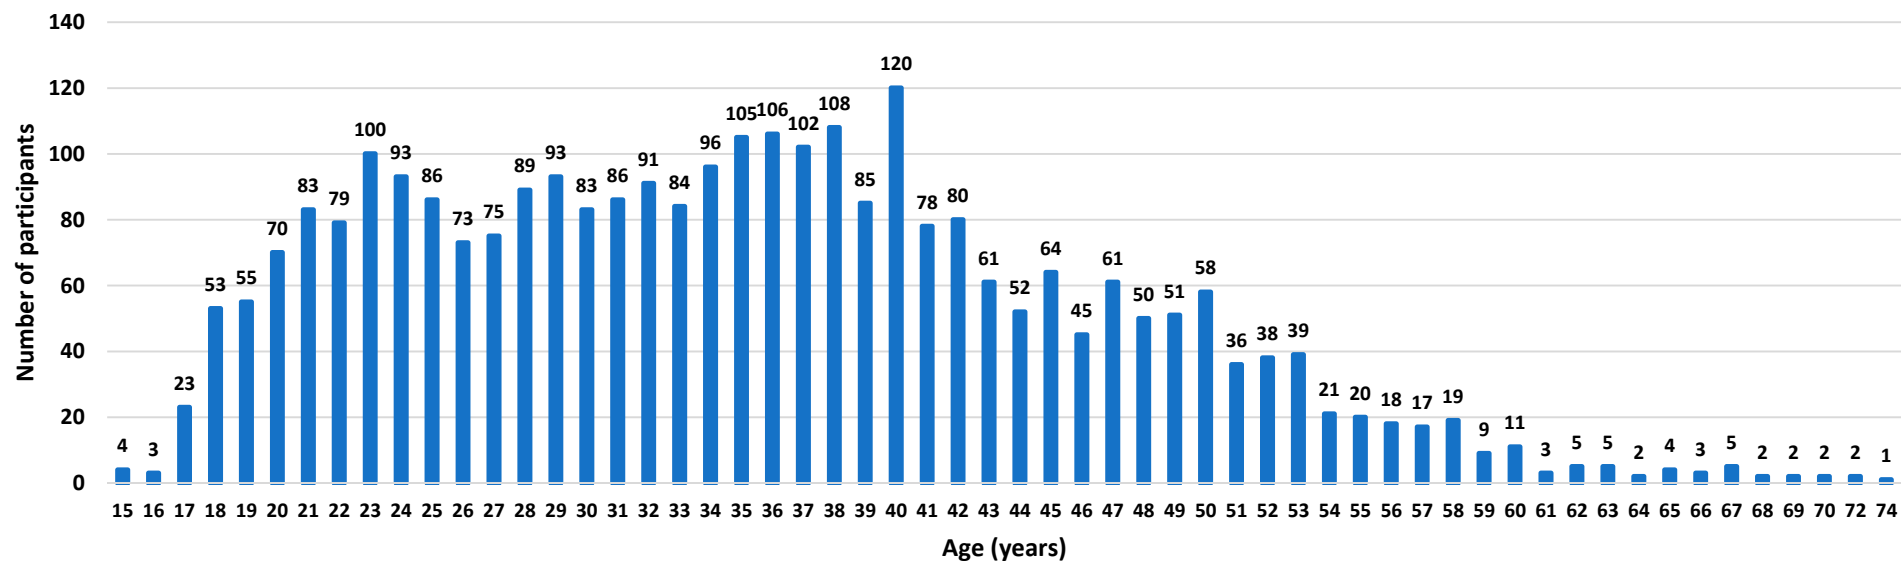

Figure S1. Age in years in the EMIS-2017 sample in Greece ( $N = 2909$ ).

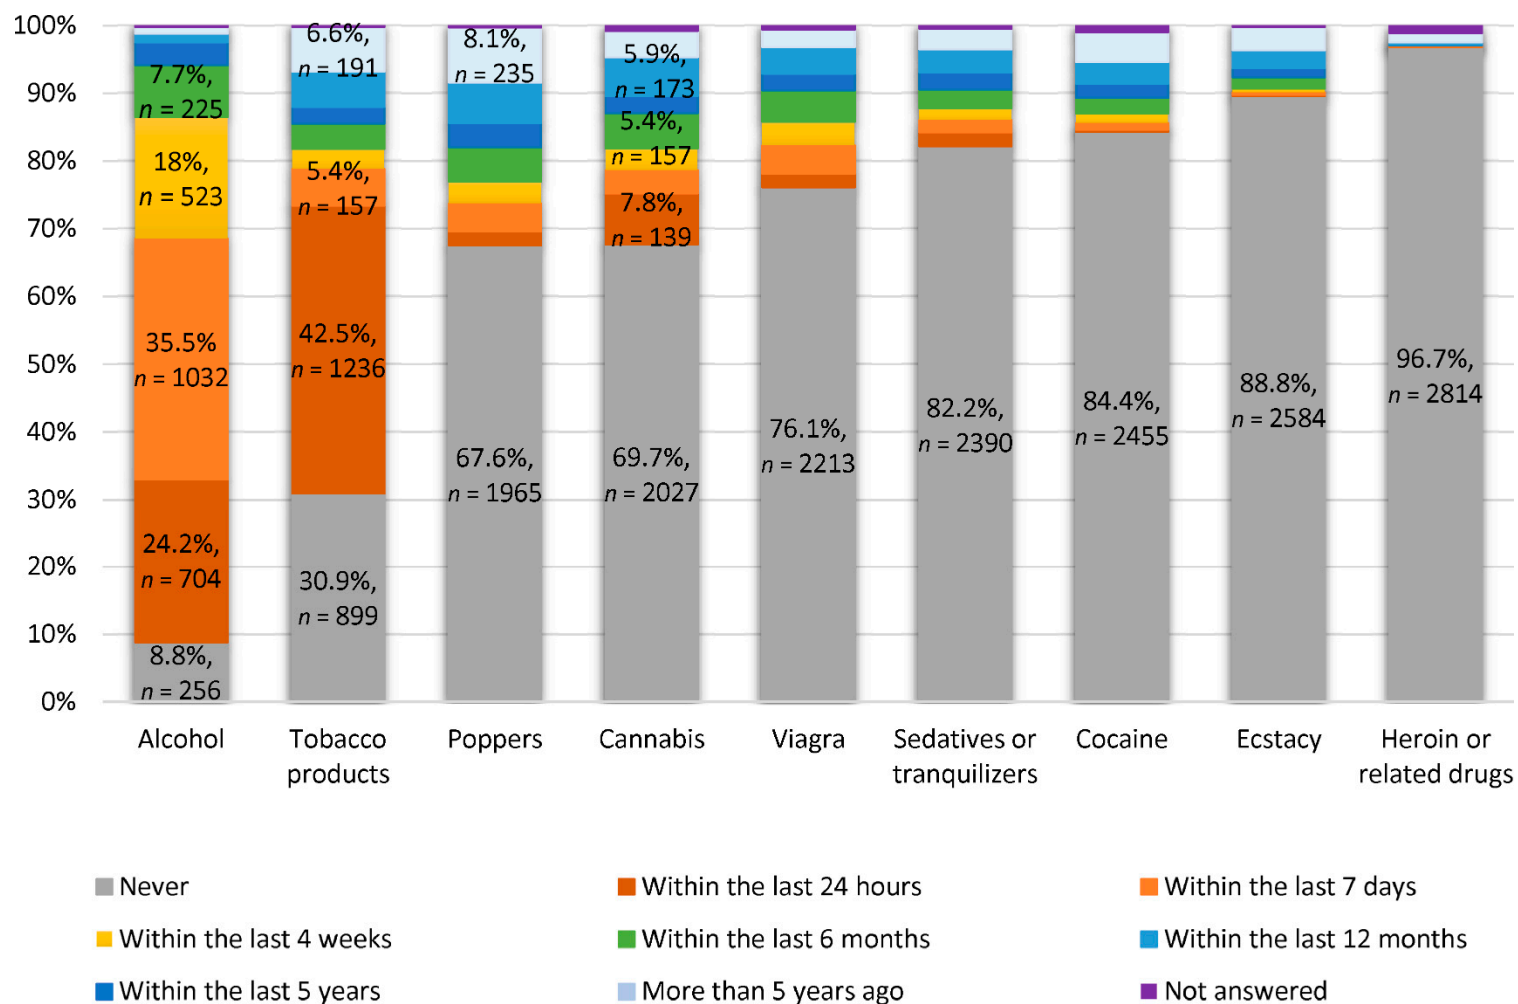

**Figure S2.** Recency of using selected substances. Not included are synthetic cannabinoids, amphetamine, crystal methamphetamine, mephedrone, synthetic stimulants other than mephedrone, GHB/GBL, ketamine, LSD, crack cocaine.
